# Supplementary material
Source: PubMed Central journal article supplement (PMC4569595)
Supplement: NIHMS720377-supplement-supplement_1.pdf [file NIHMS720377-supplement-supplement_1.pdf]

# Income Inequality and Intergenerational Income Mobility in the United States

ONLINE APPENDIX

TABLES, FIGURES AND  
SUPPLEMENTAL DATA DESCRIPTION

Deirdre Bloome\*

---

\*Department of Sociology, Population Studies Center and Survey Research Center, University of Michigan, Institute for Social Research Room 2086, 426 Thompson St., Ann Arbor, MI 48106. Email: [dbloome@umich.edu](mailto:dbloome@umich.edu).

**Table (A1)** Family income inequality by state and year. Decennial Census and IRS data.

|                      | Gini |      |      |      | Top 1% Share |      |      |      |
|----------------------|------|------|------|------|--------------|------|------|------|
|                      | 1969 | 1979 | 1989 | 1999 | 1969         | 1979 | 1989 | 1999 |
| Alabama              | .393 | .385 | .418 | .435 | .077         | .075 | .120 | .152 |
| Alaska               | .366 | .369 | .387 | .377 | .055         | .057 | .102 | .115 |
| Arizona              | .363 | .365 | .413 | .429 | .083         | .077 | .119 | .165 |
| Arkansas             | .404 | .389 | .405 | .422 | .088         | .080 | .113 | .147 |
| California           | .357 | .372 | .422 | .458 | .081         | .091 | .158 | .227 |
| Colorado             | .349 | .354 | .394 | .411 | .081         | .077 | .118 | .181 |
| Connecticut          | .336 | .348 | .401 | .446 | .102         | .096 | .161 | .256 |
| Delaware             | .346 | .361 | .363 | .398 | .122         | .083 | .116 | .154 |
| District of Columbia | .425 | .434 | .489 | .562 | .105         | .106 | .180 | .154 |
| Florida              | .398 | .385 | .422 | .445 | .102         | .103 | .183 | .215 |
| Georgia              | .381 | .387 | .417 | .437 | .089         | .076 | .126 | .164 |
| Hawaii               | .353 | .365 | .381 | .401 | .082         | .069 | .132 | .130 |
| Idaho                | .350 | .354 | .386 | .398 | .074         | .069 | .117 | .157 |
| Illinois             | .342 | .352 | .407 | .425 | .086         | .080 | .152 | .189 |
| Indiana              | .322 | .337 | .372 | .386 | .075         | .069 | .108 | .144 |
| Iowa                 | .347 | .344 | .368 | .376 | .074         | .067 | .104 | .135 |
| Kansas               | .362 | .353 | .388 | .396 | .081         | .076 | .125 | .150 |
| Kentucky             | .392 | .385 | .421 | .434 | .078         | .076 | .124 | .142 |
| Louisiana            | .403 | .400 | .446 | .453 | .087         | .084 | .124 | .148 |
| Maine                | .328 | .342 | .373 | .396 | .074         | .070 | .109 | .147 |
| Maryland             | .349 | .352 | .384 | .407 | .078         | .071 | .125 | .153 |
| Massachusetts        | .334 | .350 | .387 | .425 | .087         | .075 | .135 | .217 |
| Michigan             | .329 | .350 | .395 | .406 | .079         | .069 | .115 | .147 |
| Minnesota            | .346 | .346 | .379 | .387 | .085         | .076 | .125 | .158 |
| Mississippi          | .427 | .401 | .435 | .446 | .086         | .080 | .109 | .145 |
| Missouri             | .369 | .362 | .400 | .413 | .086         | .075 | .122 | .158 |
| Montana              | .349 | .351 | .379 | .399 | .068         | .071 | .123 | .140 |
| Nebraska             | .355 | .351 | .375 | .384 | .078         | .075 | .122 | .164 |
| Nevada               | .332 | .350 | .386 | .411 | .116         | .105 | .191 | .237 |
| New Hampshire        | .317 | .330 | .344 | .377 | .077         | .074 | .131 | .170 |
| New Jersey           | .341 | .354 | .395 | .430 | .088         | .080 | .151 | .197 |
| New Mexico           | .389 | .383 | .431 | .438 | .074         | .075 | .106 | .138 |
| New York             | .369 | .378 | .434 | .472 | .109         | .094 | .185 | .251 |
| North Carolina       | .372 | .365 | .394 | .421 | .084         | .075 | .122 | .147 |
| North Dakota         | .369 | .358 | .379 | .383 | .066         | .069 | .097 | .120 |
| Ohio                 | .331 | .340 | .390 | .404 | .080         | .072 | .119 | .141 |
| Oklahoma             | .387 | .376 | .412 | .420 | .085         | .084 | .115 | .146 |
| Oregon               | .345 | .353 | .390 | .408 | .076         | .071 | .121 | .150 |
| Pennsylvania         | .334 | .345 | .396 | .413 | .083         | .072 | .133 | .162 |
| Rhode Island         | .341 | .347 | .377 | .416 | .087         | .076 | .131 | .153 |
| South Carolina       | .375 | .369 | .396 | .423 | .080         | .070 | .109 | .147 |
| South Dakota         | .386 | .370 | .381 | .397 | .076         | .076 | .115 | .184 |
| Tennessee            | .390 | .381 | .414 | .431 | .088         | .078 | .129 | .166 |
| Texas                | .380 | .379 | .434 | .449 | .094         | .101 | .148 | .189 |
| Utah                 | .330 | .337 | .369 | .386 | .069         | .069 | .110 | .159 |
| Vermont              | .341 | .349 | .367 | .388 | .078         | .066 | .109 | .140 |
| Virginia             | .379 | .368 | .398 | .423 | .073         | .065 | .116 | .157 |
| Washington           | .335 | .346 | .378 | .406 | .069         | .069 | .123 | .234 |
| West Virginia        | .371 | .363 | .406 | .429 | .072         | .067 | .101 | .114 |
| Wisconsin            | .326 | .335 | .365 | .372 | .075         | .069 | .111 | .146 |
| Wyoming              | .340 | .330 | .392 | .386 | .076         | .082 | .144 | .249 |

**Table (A2)** Descriptive statistics for state and parental characteristics, states/years in which PSID respondents resided at age 13-17. **PSID**, Census, and Statistical Abstracts data.

|                                          | Northeast | Midwest  | West     | South    | US       |
|------------------------------------------|-----------|----------|----------|----------|----------|
| <i>Parental Characteristics</i>          |           |          |          |          |          |
| Age (years)                              |           |          |          |          |          |
| Mean                                     | 43.47     | 41.90    | 41.90    | 40.97    | 41.96    |
| SD                                       | 5.75      | 6.01     | 5.94     | 6.27     | 6.08     |
| Education (years)                        |           |          |          |          |          |
| Mean                                     | 12.41     | 12.29    | 12.60    | 11.46    | 12.13    |
| SD                                       | 2.11      | 2.10     | 2.28     | 2.83     | 2.40     |
| Race (%)                                 |           |          |          |          |          |
| White                                    | 94.80     | 93.98    | 87.65    | 77.80    | 88.45    |
| Black                                    | 4.30      | 4.76     | 2.71     | 19.90    | 8.73     |
| Other                                    | .90       | 1.26     | 9.64     | 2.30     | 2.81     |
| Marital Status (%)                       |           |          |          |          |          |
| Stably Married                           | 71.72     | 66.39    | 59.94    | 65.62    | 66.27    |
| Both Stably Single                       | .45       | .14      | .90      | .66      | .48      |
| Both Unstably Married                    | 16.74     | 16.11    | 21.99    | 17.27    | 17.51    |
| Other                                    | 11.09     | 17.37    | 17.17    | 16.45    | 15.74    |
| (e.g., one single, one unstably married) |           |          |          |          |          |
| Child Male (%)                           | 47.06     | 51.82    | 47.59    | 48.19    | 49.45    |
| Child's year of birth (mean)             | 1962.25   | 1963.42  | 1963.55  | 1964.07  | 1963.55  |
| <i>State Characteristics</i>             |           |          |          |          |          |
| Median Family Income                     |           |          |          |          |          |
| Mean                                     | 52330.62  | 50239.56 | 50451.35 | 42202.84 | 48382.80 |
| SD                                       | 4981.89   | 4117.29  | 2639.93  | 5997.13  | 6224.19  |
| Percent Black                            | 9.76      | 8.28     | 4.68     | 19.05    | 11.14    |
| Percent Hispanic                         | 4.92      | 1.59     | 11.89    | 3.99     | 4.62     |
| Percent Foreign Born                     | 9.14      | 3.30     | 10.02    | 3.55     | 5.67     |
| Percent Poor                             | 10.54     | 10.97    | 11.28    | 17.15    | 12.72    |
| Unemployment                             | 6.11      | 6.45     | 6.33     | 5.70     | 6.14     |
| Region (%)                               |           |          |          |          |          |
| Northeast                                | 100       | 0        | 0        | 0        | 21.09    |
| Midwest                                  | 0         | 100      |          | 0        | 34.06    |
| West                                     | 0         | 0        | 100      | 0        | 15.84    |
| South                                    | 0         | 0        | 0        | 100      | 29.01    |
| Economic Segregation (State NSI)         |           |          |          |          |          |
| Mean                                     | .46       | .44      | .43      | .43      | .44      |
| SD                                       | .07       | .06      | .07      | .05      | .06      |
| Education spending per child age 5-17    |           |          |          |          |          |
| Mean                                     | 5387.11   | 5578.74  | 6495.15  | 5023.64  | 5522.46  |
| SD                                       | 1882.43   | 1773.12  | 1704.45  | 1575.84  | 1794.85  |
| Health spending per capita               |           |          |          |          |          |
| Mean                                     | 312.74    | 274.38   | 266.86   | 280.26   | 282.98   |
| SD                                       | 154.50    | 88.09    | 86.56    | 117.68   | 114.53   |
| Welfare spending per capita              |           |          |          |          |          |
| Mean                                     | 605.05    | 428.35   | 504.56   | 292.54   | 438.29   |
| SD                                       | 211.26    | 176.59   | 191.86   | 92.23    | 202.61   |
| <i>N</i> individuals                     | 442       | 714      | 332      | 608      | 2096     |
| <i>N</i> states                          | 6         | 12       | 7        | 16       | 41       |

**Table (A3)** Descriptive statistics for state and parental characteristics, states in which NLSY79 respondents resided in 1979. **NLSY79**, Census, and Statistical Abstracts data.

|                                       | Northeast | Midwest  | West     | South    | US       |
|---------------------------------------|-----------|----------|----------|----------|----------|
| <i>Parental Characteristics</i>       |           |          |          |          |          |
| Age (years)                           |           |          |          |          |          |
| Mean                                  | 45.25     | 44.84    | 44.26    | 44.36    | 44.63    |
| SD                                    | 6.83      | 6.84     | 7.13     | 7.40     | 7.12     |
| Education (years)                     |           |          |          |          |          |
| Mean                                  | 11.12     | 11.57    | 9.99     | 10.33    | 10.73    |
| SD                                    | 3.11      | 2.60     | 3.97     | 3.10     | 3.22     |
| Race (%)                              |           |          |          |          |          |
| White                                 | 49.58     | 55.48    | 32.74    | 30.65    | 40.92    |
| Black                                 | 24.37     | 22.37    | 10.15    | 47.65    | 30.02    |
| Hispanic                              | 18.78     | 4.61     | 46.34    | 13.91    | 18.27    |
| Other                                 | 7.28      | 17.54    | 10.77    | 7.79     | 10.78    |
| Marital Status (%)                    |           |          |          |          |          |
| Parent Married, Child Age 14          | 70.68     | 81.36    | 77.93    | 72.43    | 75.44    |
| Child Male (%)                        | 51.90     | 51.68    | 50.21    | 47.75    | 49.91    |
| Child's year of birth (mean)          | 1962.47   | 1962.53  | 1962.65  | 1962.56  | 1962.38  |
| <i>State Characteristics</i>          |           |          |          |          |          |
| Median Family Income                  |           |          |          |          |          |
| Mean                                  | 52178.49  | 52303.31 | 49833.70 | 43338.13 | 48454.30 |
| SD                                    | 3844.38   | 3253.53  | 2959.12  | 3753.23  | 5375.51  |
| Percent Black                         | 10.91     | 9.38     | 5.68     | 20.19    | 13.05    |
| Percent Hispanic                      | 5.80      | 1.84     | 16.61    | 6.11     | 6.85     |
| Percent Foreign Born                  | 10.18     | 3.77     | 11.76    | 4.27     | 6.57     |
| Percent Poor                          | 10.85     | 10.27    | 11.63    | 15.48    | 12.59    |
| Unemployment                          | 6.45      | 7.25     | 6.43     | 5.83     | 6.42     |
| Region (%)                            |           |          |          |          |          |
| Northeast                             | 100       | 0        | 0        | 0        | 18.06    |
| Midwest                               | 0         | 100      |          | 0        | 26.06    |
| West                                  | 0         | 0        | 100      | 0        | 18.21    |
| South                                 | 0         | 0        | 0        | 100      | 37.66    |
| Economic Segregation (State NSI)      |           |          |          |          |          |
| Mean                                  | .51       | .47      | .47      | .44      | .47      |
| SD                                    | .04       | .05      | .05      | .05      | .05      |
| Education spending per child age 5-17 |           |          |          |          |          |
| Mean                                  | 5999.69   | 5944.02  | 6970.11  | 5173.41  | 5850.71  |
| SD                                    | 997.33    | 700.13   | 334.96   | 547.76   | 920.82   |
| Health spending per capita            |           |          |          |          |          |
| Mean                                  | 322.96    | 322.98   | 321.83   | 351.40   | 333.47   |
| SD                                    | 111.38    | 47.30    | 40.60    | 82.59    | 76.71    |
| Welfare spending per capita           |           |          |          |          |          |
| Mean                                  | 655.96    | 495.23   | 556.50   | 303.46   | 463.19   |
| SD                                    | 146.05    | 133.94   | 193.44   | 151.88   | 205.41   |
| <i>N</i> individuals                  | 948       | 1368     | 956      | 1977     | 5249     |
| <i>N</i> states                       | 6         | 11       | 8        | 16       | 41       |

**Table (A4)** Family income elasticity trends: comparing coefficients and standard errors with previous research. SRC subsample, sons only. PSID data.

| Cohort | Lee and Solon |      | Current Analysis |       |
|--------|---------------|------|------------------|-------|
|        | $\beta$       | se   | $\beta$          | se    |
| 1954   | 0.50          | 0.15 | 0.492            | 0.047 |
| 1955   | 0.48          | 0.13 | 0.469            | 0.047 |
| 1956   | 0.42          | 0.14 | 0.480            | 0.047 |
| 1957   | 0.52          | 0.12 | 0.463            | 0.048 |
| 1958   | 0.46          | 0.11 | 0.479            | 0.047 |
| 1959   | 0.39          | 0.11 | 0.454            | 0.047 |
| 1960   | 0.41          | 0.12 | 0.422            | 0.047 |
| 1961   | 0.47          | 0.10 | 0.469            | 0.047 |
| 1962   | 0.41          | 0.12 | 0.457            | 0.047 |
| 1963   | 0.38          | 0.09 | 0.422            | 0.047 |
| 1964   | 0.42          | 0.09 | 0.448            | 0.047 |
| 1965   | 0.36          | 0.08 | 0.431            | 0.048 |
| 1966   | 0.43          | 0.08 | 0.469            | 0.049 |
| 1967   | 0.45          | 0.08 | 0.496            | 0.046 |
| 1968   | 0.49          | 0.08 | 0.467            | 0.049 |
| 1969   | 0.43          | 0.07 | 0.513            | 0.047 |
| 1970   | 0.40          | 0.07 | 0.466            | 0.048 |
| 1971   | 0.43          | 0.07 | 0.454            | 0.047 |
| 1972   |               |      | 0.476            | 0.047 |
| 1973   | 0.47          | 0.06 | 0.431            | 0.046 |
| 1974   |               |      | 0.475            | 0.047 |
| 1975   | 0.47          | 0.06 |                  |       |

*Note:* “Current analysis” estimates from random coefficient models (partially pooled estimates). “Lee and Solon” estimates from Table 1 of their paper (2009), OLS models. In Table 1 they report by year rather than cohort; cohorts reported here are year minus 25. Several differences in the analyses generate some divergence in the results, including the ages studied and the empirical models. See papers for greater detail.

**Table (A5)** Family income elasticity-Gini models. Gini coefficient measured in early childhood, and standardized to mean 0, standard deviation 1. **PSID** and Census data.

|                                            | OLS             |                 | Random Effects  |                 | Fixed Effects   |
|--------------------------------------------|-----------------|-----------------|-----------------|-----------------|-----------------|
|                                            | Model 1         | Model 2         | Model 3         | Model 4         | Model 5         |
| <i>Income Not Adjusted for Family Size</i> |                 |                 |                 |                 |                 |
| Parental Income                            | .481<br>(.022)  | .456<br>(.034)  | .434<br>(.023)  | .432<br>(.030)  | .412<br>(.034)  |
| Parental Income*Gini                       |                 | .057<br>(.029)  | .051<br>(.022)  | .055<br>(.026)  | .044<br>(.030)  |
| Gini                                       |                 | -.662<br>(.328) | -.603<br>(.240) | -.651<br>(.282) | -.531<br>(.344) |
| Intercept                                  | 5.671<br>(.246) | 5.957<br>(.381) | 6.192<br>(.260) | 6.219<br>(.322) | 6.370<br>(.367) |
| State-year Intercept                       |                 |                 | ✓               | ✓               | ✓               |
| State-year Slope                           |                 |                 |                 | ✓               |                 |
| AIC                                        | 4201.478        | 4188.380        | 4198.721        | 4202.876        | 4185.268        |
| <i>Income Adjusted for Family Size</i>     |                 |                 |                 |                 |                 |
| Parental Income                            | .539<br>(.021)  | .521<br>(.032)  | .497<br>(.023)  | .496<br>(.029)  | .475<br>(.033)  |
| Parental Income*Gini                       |                 | .040<br>(.030)  | .035<br>(.021)  | .039<br>(.025)  | .032<br>(.033)  |
| Gini                                       |                 | -.432<br>(.318) | -.392<br>(.209) | -.431<br>(.256) | -.346<br>(.347) |
| Intercept                                  | 4.913<br>(.219) | 5.107<br>(.338) | 5.354<br>(.235) | 5.366<br>(.303) | 5.541<br>(.329) |
| State-year Intercept                       |                 |                 | ✓               | ✓               | ✓               |
| State-year Slope                           |                 |                 |                 | ✓               |                 |
| AIC                                        | 4077.574        | 4073.751        | 4076.984        | 4080.124        | 4063.679        |
| <i>N</i> individuals                       | 2393            | 2393            | 2393            | 2393            | 2393            |
| <i>N</i> state-years                       | 686             | 686             | 686             | 686             | 686             |
| <i>N</i> states                            | 42              | 42              | 42              | 42              | 42              |

*Note:* Standard errors in parentheses (robust, clustered by state and year). Gini coefficient captures inequality in the year a PSID respondent was about 4 years old in the state in which he resided around age 14. Random effects models fit with restricted maximum likelihood (REML).

**Table (A6)** Family income elasticity-Gini models. Gini measured in state and year of birth, and standardized to mean 0, standard deviation 1. **NLSY79** and Census data.

|                                            | OLS             |                 |                 |                 |                 |                 |                 |                 |
|--------------------------------------------|-----------------|-----------------|-----------------|-----------------|-----------------|-----------------|-----------------|-----------------|
|                                            | Model 1         | Model 2         | Model 3         | Model 4         | Model 5         | Model 6         | Model 7         | Model 8         |
| <i>Income Not Adjusted for Family Size</i> |                 |                 |                 |                 |                 |                 |                 |                 |
| Parental Income                            | .473<br>(.018)  | .456<br>(.020)  | .482<br>(.016)  | .483<br>(.016)  | .474<br>(.025)  | .484<br>(.025)  | .458<br>(.022)  | .456<br>(.016)  |
| Parental Income*Gini                       |                 | -.009<br>(.018) | -.039<br>(.015) | -.040<br>(.015) | -.034<br>(.023) | -.035<br>(.023) | -.011<br>(.019) | -.006<br>(.010) |
| Gini                                       |                 | .053<br>(.188)  | .379<br>(.156)  | .390<br>(.156)  | .322<br>(.244)  | .329<br>(.245)  | -.072<br>(.219) | -.081<br>(.151) |
| Intercept                                  | 5.746<br>(.198) | 5.917<br>(.221) | 5.586<br>(.170) | 5.568<br>(.171) | 5.664<br>(.269) | 5.643<br>(.276) | .055<br>(.006)  | 6.124<br>(.138) |
| State Intercept                            |                 |                 | ✓               | ✓               | ✓               | ✓               | ✓               | ✓               |
| Year Intercept                             |                 |                 |                 | ✓               |                 |                 |                 | ✓               |
| State Slope                                |                 |                 |                 |                 | ✓               |                 |                 |                 |
| Year Slope                                 |                 |                 |                 |                 |                 | ✓               |                 |                 |
| AIC                                        | 13082.038       | 13064.958       | 12374.229       | 12374.229       | 12361.135       | 12361.135       | 12991.441       | 12991.441       |
| <i>Income Adjusted for Family Size</i>     |                 |                 |                 |                 |                 |                 |                 |                 |
| Parental Income                            | .469<br>(.017)  | .454<br>(.014)  | .483<br>(.015)  | .486<br>(.015)  | .482<br>(.020)  | .486<br>(.021)  | .455<br>(.016)  | .457<br>(.010)  |
| Parental Income*Gini                       |                 | -.008<br>(.012) | -.039<br>(.014) | -.040<br>(.014) | -.037<br>(.018) | -.038<br>(.018) | -.012<br>(.014) | -.005<br>(.004) |
| Gini                                       |                 | .038<br>(.119)  | .357<br>(.134)  | .373<br>(.134)  | .338<br>(.180)  | .353<br>(.179)  | -.120<br>(.148) | -.113<br>(.073) |
| Intercept                                  | 5.652<br>(.170) | 5.798<br>(.145) | 5.467<br>(.147) | 5.435<br>(.149) | 5.477<br>(.200) | 5.439<br>(.215) | .041<br>(.005)  | 5.985<br>(.130) |
| State Intercept                            |                 |                 | ✓               | ✓               | ✓               | ✓               | ✓               | ✓               |
| Year Intercept                             |                 |                 |                 |                 | ✓               |                 |                 | ✓               |
| State Slope                                |                 |                 |                 |                 |                 | ✓               |                 |                 |
| Year Slope                                 |                 |                 |                 |                 |                 |                 | ✓               |                 |
| AIC                                        | 12347.558       | 12333.463       | 11746.236       | 11746.236       | 11743.711       | 11743.711       | 12239.462       | 12239.462       |
| <i>N</i> individuals                       | 5354            | 5354            | 5354            | 5354            | 5354            | 5354            | 5354            | 5354            |
| <i>N</i> state-years                       | 264             | 264             | 264             | 264             | 264             | 264             | 264             | 264             |
| <i>N</i> states                            | 49              | 49              | 49              | 49              | 49              | 49              | 49              | 49              |

*Note:* Standard errors in parentheses (robust, clustered by state in models 2, 3, 5, and 7; clustered by state and year in models 4, 6, and 8). Gini measured in respondent's state and year of birth. Respondents born 1960-65, allowing random and fixed effects by both state and year (unlike the main NLSY79 analysis, which permits random and fixed effects by state only because the Gini is measured in the same year for all respondents, 1979). Random effects models fit with restricted maximum likelihood (REML).

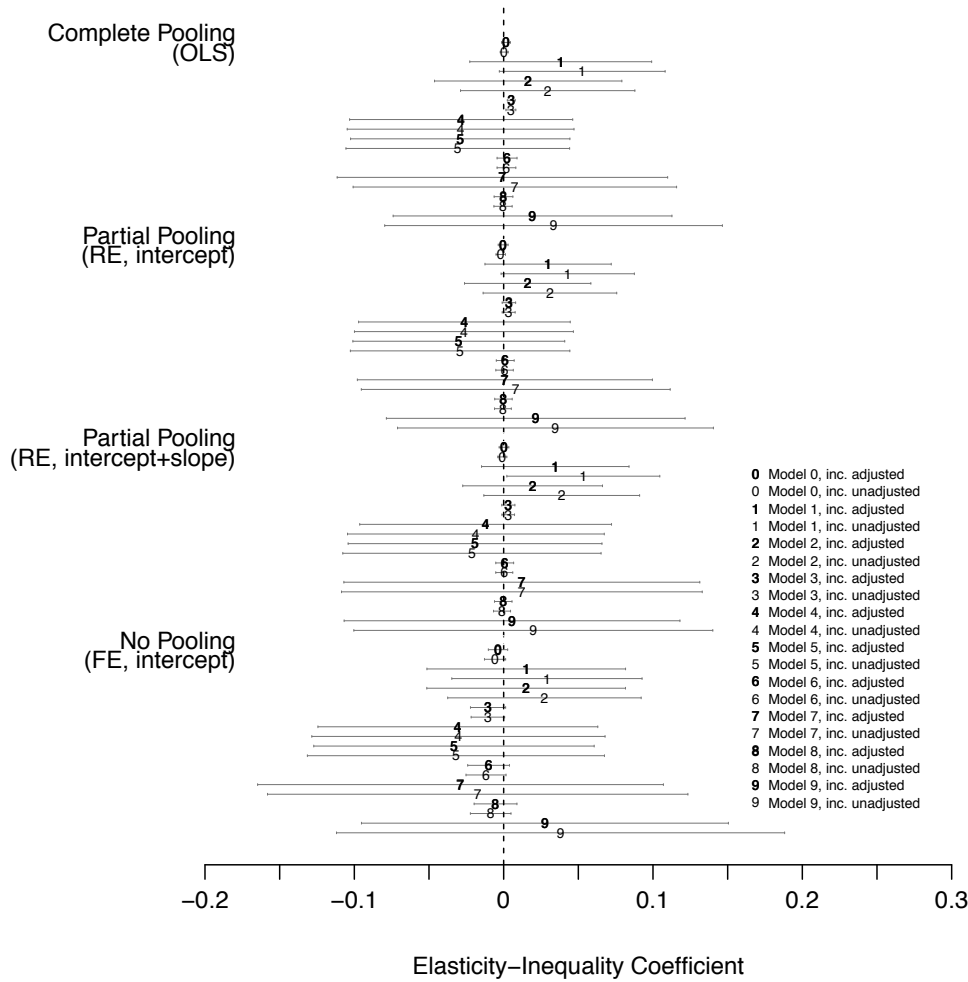

**Figure (A1)** Model robustness checks for mobility-inequality relationship. **PSID**, Census, and Statistical Abstracts data. Estimates (with 95% confidence intervals) of elasticity-inequality coefficient. Inequality measures standardized (mean 0, sd 1). Models use different income measures (income un/adjusted for family size) to explore (a) different covariate vectors and (b) different error structures (OLS “complete pooling,” random effects “partial pooling,” and fixed effects “no pooling” of between state/year information). Covariate vectors are as follow:

|                                           | Model 0 | Model 1 | Model 2 | Model 3 | Model 4 | Model 5 | Model 6 | Model 7 | Model 8 | Model 9 |
|-------------------------------------------|---------|---------|---------|---------|---------|---------|---------|---------|---------|---------|
| Parental Income Main Effect               | ✓       | ✓       | ✓       | ✓       | ✓       | ✓       | ✓       | ✓       | ✓       | ✓       |
| Gini*Parental Income                      | ✓       | ✓       | ✓       | ✓       | ✓       | ✓       | ✓       | ✓       | ✓       | ✓       |
| Gini Main Effect                          |         | ✓       | ✓       | -       | ✓       | ✓       | -       | ✓       | -       | ✓       |
| State-Level Covariates’ Main Effects      |         |         | ✓       | -       | ✓       | ✓       | -       | ✓       | -       | ✓       |
| State-Level Covariates*Parental Income    |         |         |         | ✓       | ✓       | ✓       | ✓       | ✓       | ✓       | ✓       |
| State-Level Mediators’ Main Effects       |         |         |         |         |         | ✓       | -       | ✓       | -       | ✓       |
| State-Level Mediators*Parental Income     |         |         |         |         |         |         | ✓       | ✓       | ✓       | ✓       |
| Individual-Level Covariates’ Main Effects |         |         |         |         |         |         |         |         | ✓       | ✓       |

*Note:* Within each pair of models (3, 4), (6, 7), and (8, 9) the same predictors are used, except for the state-level main effects, which are included in only the second model of each pair. State-level covariates: % black, % hispanic, % foreign born, median income, % poor, lagged unemployment, region. State-level mediators: education spending per child age 5-17, health spending per capita, welfare spending per capita, residential segregation. Individual-level covariates: parental age, parental education, parental marital status, race, and child’s sex.



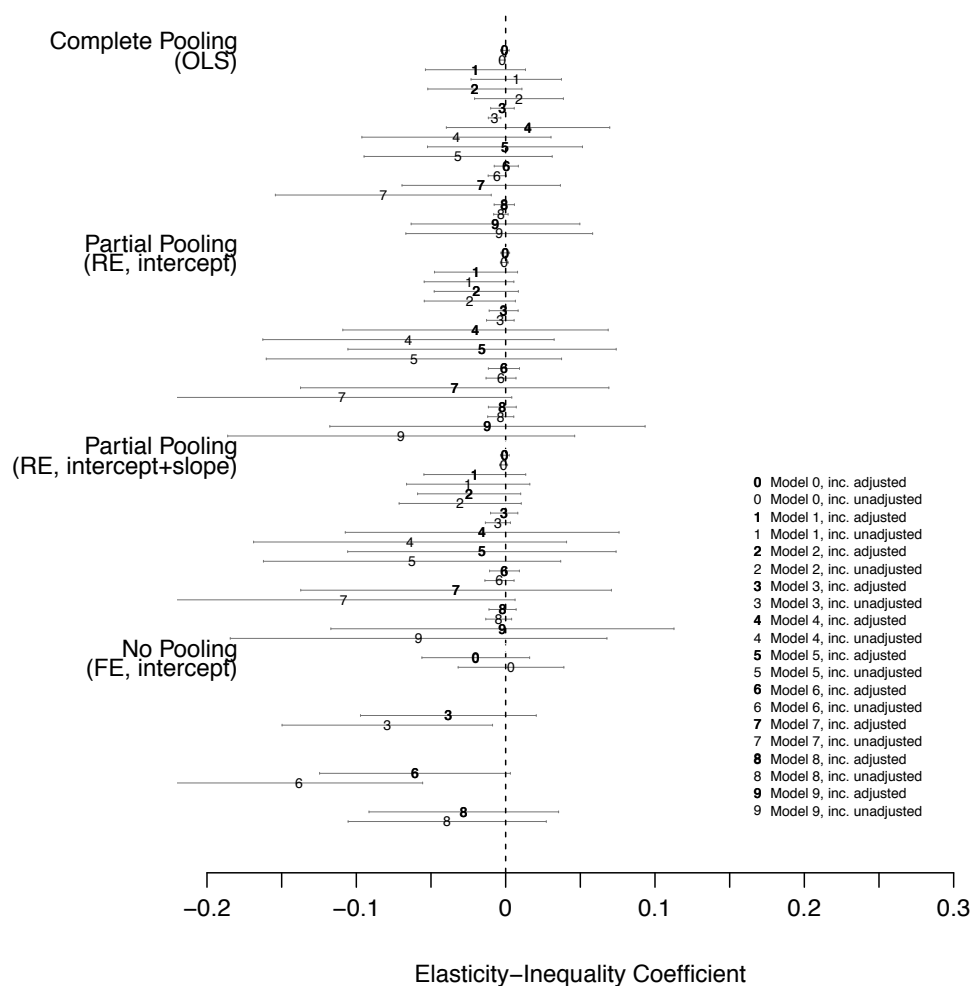

**Figure (A2)** Model robustness checks for mobility-inequality relationship. NLSY79, Census, and Statistical Abstracts data. Estimates (with 95% confidence intervals) of elasticity-inequality coefficient. Inequality measures standardized (mean 0, sd 1). Models use different income measures (income un/adjusted for family size) to explore (a) different covariate vectors and (b) different error structures (OLS “complete pooling,” random effects “partial pooling,” and fixed effects “no pooling” of between state information). Covariate vectors are as follow:

|                                           | Model 0 | Model 1 | Model 2 | Model 3 | Model 4 | Model 5 | Model 6 | Model 7 | Model 8 | Model 9 |
|-------------------------------------------|---------|---------|---------|---------|---------|---------|---------|---------|---------|---------|
| Parental Income Main Effect               | ✓       | ✓       | ✓       | ✓       | ✓       | ✓       | ✓       | ✓       | ✓       | ✓       |
| Gini*Parental Income                      | ✓       | ✓       | ✓       | ✓       | ✓       | ✓       | ✓       | ✓       | ✓       | ✓       |
| Gini Main Effect                          |         | ✓       | ✓       | -       | ✓       | ✓       | -       | ✓       | -       | ✓       |
| State-Level Covariates' Main Effects      |         |         | ✓       | -       | ✓       | ✓       | -       | ✓       | -       | ✓       |
| State-Level Covariates*Parental Income    |         |         |         | ✓       | ✓       | ✓       | ✓       | ✓       | ✓       | ✓       |
| State-Level Mediators' Main Effects       |         |         |         |         |         | ✓       | -       | ✓       | -       | ✓       |
| State-Level Mediators*Parental Income     |         |         |         |         |         |         | ✓       | ✓       | ✓       | ✓       |
| Individual-Level Covariates' Main Effects |         |         |         |         |         |         |         |         | ✓       | ✓       |

*Note:* Within each pair of models (3, 4), (6, 7), and (8, 9) the same predictors are used, except for the state-level main effects, which are included in only the second model of each pair. Some covariate vector/error structure combinations not shown, because in the NLSY79, fixed effects specifications with state-level main effects cannot be estimated. State-level covariates: % black, % hispanic, % foreign born, median income, % poor, lagged unemployment, region. State-level mediators: education spending per child age 5-17, health spending per capita, welfare spending per capita, residential segregation. Individual-level covariates: parental age, parental education, parental marital status, race, and child’s sex.

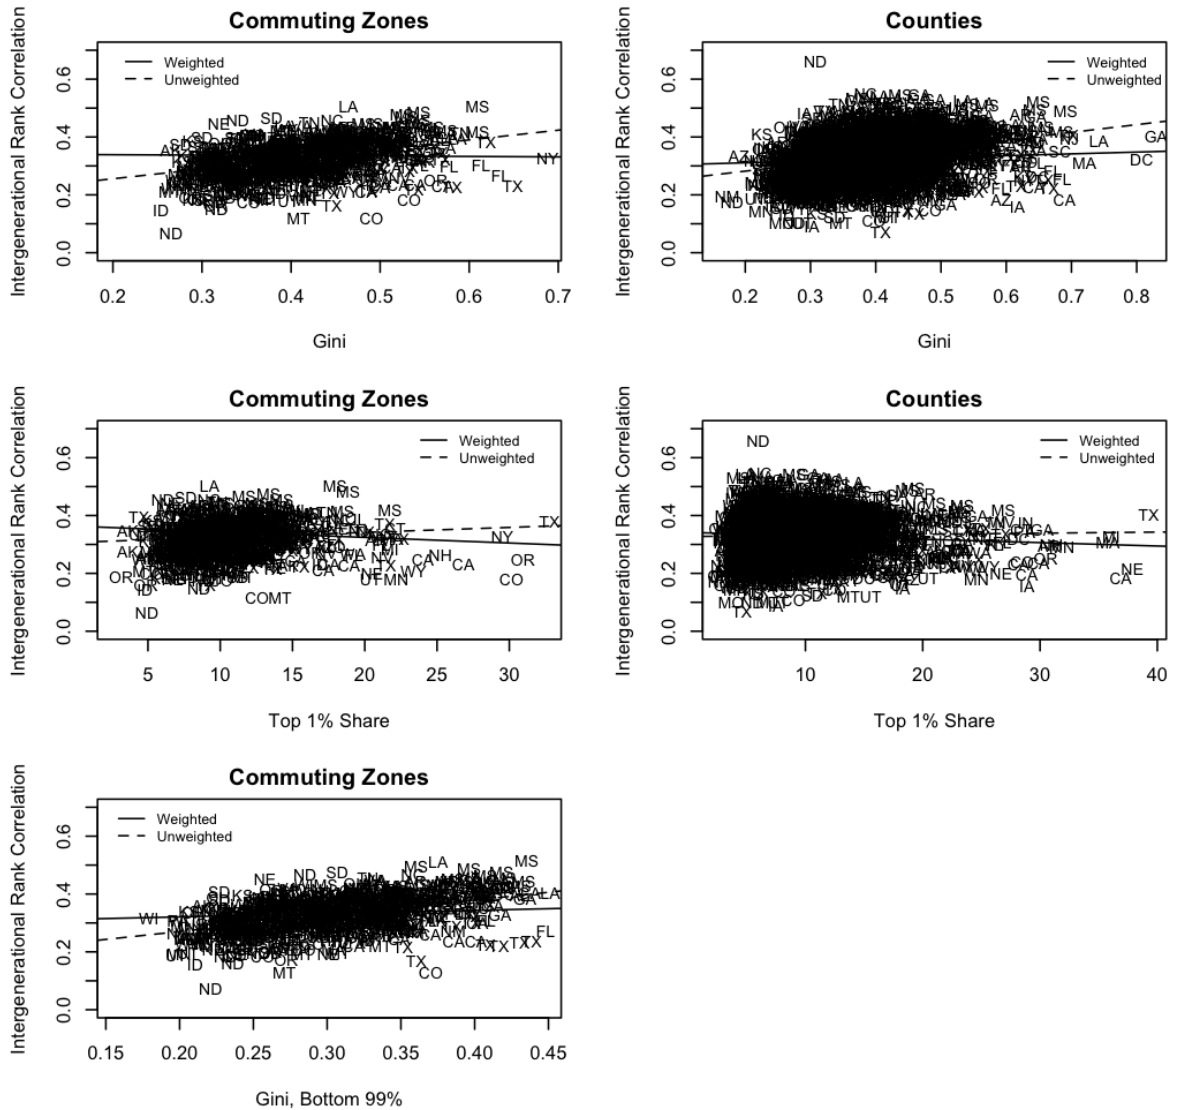

**Figure (A3)** Family income mobility and inequality by U.S. Census commuting zone and county, stratified OLS estimates. Slope coefficients from regressions of child income rank on parent income rank plotted against local-area inequality. Fitted lines from regressions of area-specific slopes on area-specific inequality, either unweighted or weighted by the number of children in each local area used to estimate the intergenerational slopes. Birth cohorts 1980-1982, IRS data.

## Appendix A: Supplemental Data

I draw on several data sources to examine potential mediators and confounders of the mobility-inequality association. The PSID and NLSY79 provide variables including parents' age, race, education, and marital status.<sup>1</sup> The Census Bureau's annual *Statistical Abstract of the United States* provide information on states' social spending. I divide spending by the number of residents (or number of children age 5-17, using the Census Bureau's Intercensal Estimates of the Resident Population of States by Age) to obtain annual per-capita welfare spending, per-capita health and hospital spending, and per-child education spending. Watson (2009) provides Census-based economic segregation measures. The "neighborhood sorting index" (NSI—the square root of the share of MSA income variance between tracts) ranges theoretically between zero and one, when segregation is complete and all variance lies between tracts. To generate state-level measures, I average each state's MSAs' NSIs, weighting by population<sup>2</sup> and linearly interpolating intercensal years by state.<sup>3</sup> Census microdata provide information on the percent of the state population that is African American, percent Hispanic, percent foreign born, percent poor, median family income, and the unemployment rate.<sup>4</sup> I linearly interpolate intercensal years by state. Tables A2-A3 provide descriptive statistics.<sup>5</sup>

I also analyze administrative IRS records, which permit mobility estimates in smaller geographic areas than national surveys. I rely on Chetty and collaborators' (Chetty, Hendren, Kline, Saez, and Turner 2014) mobility and inequality measures because the IRS microdata are not available; their measures are close enough to mine to provide good analogs to the primary analysis. Chetty et al. calculate mobility by ranking each parent's and child's income in the national (generation-specific) distribution, obtaining percentiles ranging from 0-100. They then regress child's income rank on parent's rank separately by local area (county or commuting zone); the slope measures mobility through an intergenerational rank correlation. (Consequently, their mobility estimates tend

---

<sup>1</sup>I employ information on both parents when available.

<sup>2</sup>For MSAs straddling state borders, I apportion NSIs by the states' population shares.

<sup>3</sup>Because of possible lags in responses to inequality, I measured these hypothesized mediators contemporaneously with inequality but also 1-5 years after. Measurement year did not influence the results. Reported results measure inequality and mediators contemporaneously.

<sup>4</sup>All are measured contemporaneously with inequality, except unemployment, which is lagged four years to capture conditions for children entering the labor market.

<sup>5</sup>Tables A2-A3 contain fewer observations than Tables 1-2 because they only include respondents with fully-observed covariates. Explorations using multiply-imputed datasets generated similar results.

to be lower than mine, since in eras of rising inequality, correlations are always lower than elasticities; see Empirical Methods section of the main manuscript.) They measure inequality with the fraction of aggregate parent income in the local area (county or commuting zone) accruing to parents in the top 1% of the national income distribution, as well as the local-area Gini and the Gini of parents in the lower 99% of the distribution. Income comes from IRS tax records, 1996-2012, and equals the sum of Form 1040 AGI, social security income, and tax-exempt interest minus taxable social security income. These income measures should capture the income of affluent (poor) families better (worse) than the PSID and NLSY79 survey measures, due to differential non-response and tax-return filing across the income distribution. Chetty et al. focus on birth cohorts 1980-1982, more recently born than my PSID and NLSY79 respondents. Childhood income is captured around ages 15-20 (1996-2000) and adult income around 29-32 (2011-2012). Commuting zone is assigned by the earliest observed ZIP-5 code reported on the primary parent's Form 1040 (typically in 1996).
